1 **Self-medication with antibiotics- a survey among traders in the central business district of**  
2 **Accra, Ghana.**

3 S. K. Ofori,<sup>1,2</sup> E.A. Akowuah,<sup>3</sup> C.E. Amankwa,<sup>4</sup> D. Babatunde,<sup>2</sup> F. Baiden<sup>5</sup>

4 <sup>1</sup> Ensign College of Public Health, KPONG-Ghana

5 <sup>2</sup> Department of Biostatistics, Epidemiology and Environmental Health Sciences, Jiann-Ping Hsu  
6 College of Public Health, Georgia Southern University

7 <sup>3</sup> Department of Public Health, Baylor University, Waco, TX 76708, USA.

8 <sup>4</sup> Department of Pharmacology and Neuroscience, North Texas Eye Research Institute, Graduate  
9 School of Biomedical Sciences, University of North Texas Health Science Center.

10 <sup>5</sup> Department of Clinical Research, London School of Hygiene and Tropical Medicine London,  
11 WC1E 7HT

12

13

14

15

16

17

18

19

20

21

22

23 **ABSTRACT**

24 **Background**

25 The misuse of antibiotics is a global problem, and the form of misuse varies among different  
26 countries and cultures. The study explored antibiotic self-medication practices among traders in  
27 Accra, Ghana.

28 **Methods:** A paper-based questionnaire survey was conducted among traders found in a  
29 convenient sample of shops in the Central Business District (CBD) between November 2016 and  
30 January 2017. The data was analyzed with Stata version 14.0. Antibiotic self-medication was  
31 defined as the use of antibiotics without the prescription of a recognized practitioner within 12  
32 months of the survey. Descriptive analysis and analytical statistics using multivariate logistic  
33 regression analysis were performed to identify the factors associated with antibiotic self-  
34 medication.

35 **Results:** Four hundred and seventeen (417) traders (60.0% females) with a mean age of 36  
36 ( $\pm 10.6$ ) years were surveyed. The prevalence of antibiotic self-medication was 66.7%. Penicillins  
37 were the most misused. Upper respiratory infections and gastrointestinal tract infections were the  
38 leading reasons for antibiotic self-medication. The most common sources of information on self-  
39 medicated antibiotics were community pharmacies (55.2%), doctors (17.8%), and package  
40 inserts (17.2%). People with tertiary education were less likely to use antibiotics for self-  
41 medication compared to those with no education (OR=0.39 (95% C.I; 0.16-0.98). Persons who  
42 sold food items (aOR = 3.56, 95% CI; 1.70-7.45), cosmetics (aOR = 2.61, 95% CI; 1.34-5.09),  
43 and clothing (aOR= 3.39, 95% CI; 1.88-6.12) were more likely to use antibiotics for self-  
44 medication compared to those who sold other items.

45 **Conclusion:** Self-medication with antibiotics was high among traders in the CBD of Accra,  
46 Ghana. Traders need to be educated on the proper home management of URTIs. Measures are  
47 required to restrict their access to antibiotics for self-medication.

48

49 **Keywords:** Self-medication, antibiotics, traders, misuse of antibiotics, Central Business District.

50

51

52

53

54

55

56

57

58

59

60

61

62

## 63 **Background**

64 Self-medication with antibiotics is a global public health problem with major implications for  
65 developing countries [1, 2]. An increase in drug resistance has led to an exponential rise in the  
66 cost of treatment for infections, treatment failures, and increased mortality from life-threatening  
67 infectious diseases [3]. One of the driving determinants of self-medication with antibiotics is the  
68 ease of access over the counter due to poor regulations, and this leads to the use of antibiotics for  
69 wrong indications, drug interactions, and adverse effects from contraindications [4].  
70 Furthermore, evidence suggests that people in developing countries receive their drugs as well as  
71 information on these drugs from non-pharmacists and non-trained personnel [5]. Information  
72 may also be obtained from informal sources, including friends, family [6], and the media [7].

73 Overuse and inappropriate prescribing of broad-spectrum antibiotics is a driving factor of  
74 antibiotic resistance. Studies have reported that at least half of prescribed antibiotics are not  
75 necessary or are incorrectly chosen. [8, 9] This leads to an increase in leftover drugs at homes  
76 which serves as easy access when one experiences similar symptoms. Watkins and colleagues  
77 assessed the community perceptions of antibiotic access and use and reported that participants  
78 who stopped taking antibiotics because they felt better kept leftovers [10].

79 A study in Egypt reported the prevalence rate of antibiotic abuse as 53.9% and mentioned  
80 cough and common cold as the symptoms that warranted the use of antibiotics [7]. Another study  
81 in Ethiopia reported a prevalence of 8.4%, which was far lower than that recorded in Egypt [11].  
82 In Nigeria, a prevalence of 53.8 % was reported among university students who admitted to  
83 taking antibiotics for self-medication [12].

84           As found in South Africa, self-medication is a means by which people avoid paying  
85 hospital fees and overcome other barriers to appropriate health care [5, 10]. Self-medication with  
86 drugs that include antibiotics has been reported in Ghana. Although a policy exists for regulating  
87 all medicines in Ghana, the control of antibiotics use is not covered in the National Drug Policy,  
88 which makes it easier for antibiotics to be accessed by the community. Persons eligible to  
89 prescribe antibiotics in Ghana include medical doctors, physician assistants, midwives, and  
90 trained nurses depending on the type of antibiotics [13, 14]. However, the prescription and  
91 dispensing by ineligible individuals promote the inappropriate use of antibiotics for self-  
92 medication, especially among vulnerable groups [13].

93           Previous studies on self-medication practices in Ghana have focused on groups in the  
94 country's formal sector. This includes tertiary students, medical students, and health practitioners  
95 [12, 15-17]. Ghana has a large informal sector that is dominated by petty trade and subsistence.  
96 Interventions to promote the appropriate use of antibiotics in Ghanaian society will require a  
97 good understanding of practices among people in the country's informal sector. Therefore, this  
98 study aimed to explore antibiotic self-medication practices among traders, including estimating  
99 the prevalence and identifying associated factors.

100

101

102

103

## 104 **Method**

### 105 **Study Population**

106 The study was conducted in the Central Business District (CBD) of Accra. The markets are  
107 dominated by women who sell fresh food, imported goods, local jewelry, shoes, and many more.  
108 The site was chosen because it is one of the busiest places in Accra, and it has a popular area  
109 within it called “Drug Lane” where many retail pharmacy shops are located. Participants were  
110 selected using convenient sampling. This is because traders are mobile, and it was not possible to  
111 obtain a good sampling frame. One person was chosen from each shop/stall to avoid the cluster  
112 effect.

### 113 **Data collection techniques and tools**

114 A paper-based structured questionnaire was used for data collection. Data were collected  
115 between November 2016 and January 2017. Questions were close-ended with options for  
116 participants to choose from, and participants completed the questionnaires with the aid of trained  
117 research assistants. The questionnaire consisted of socio-demographic characteristics of study  
118 participants, types of illnesses for which antibiotics were sought, reasons for self-medication,  
119 sources of advice, and classes of antibiotics used for self-medication. Self-medication with  
120 antibiotics was defined as the use of antibiotics without prescription by a recognized practitioner  
121 within one year of the survey. Research assistants were trained to show samples of antibiotics to  
122 respondents.

### 123 **Sample size calculation**

124 The study aimed to interview 417 traders under the assumption that it will afford an estimation of  
125 the prevalence of antibiotic self-medication within a margin of error of 4.3% at a 95%  
126 confidence level, using an assumed self-medication prevalence of 27.6% (18)

### 127 **Statistical Analysis**

128 The data were entered using Microsoft Excel 2013 and analyzed using STATA, version 14.0.  
129 Descriptive statistical analysis was carried out to obtain summary tables and graphs containing  
130 the demographic characteristics of the study participants. A multivariate logistic regression  
131 analysis was used to adjust for the effects of all predictors shown to be significantly associated  
132 with the misuse of antibiotics for self-medication at the univariate logistic regression level. Odds  
133 ratios (ORs) were reported with their 95% confidence intervals (C. Is), with the level of  
134 statistical significance set at  $p < 0.05$  for all tests. Results were expressed as means and standard  
135 deviations for continuous variables. Categorical data were presented as frequencies and  
136 percentages, and a Chi-square test was used to test the differences. All confounding variables  
137 were catered for, and the effect of prominent associations was evaluated using a multivariate  
138 logistic regression model to obtain the adjusted odds ratios.

139

140 **Results**

141 Four hundred and seventeen traders were surveyed between November 2016 and January 2017.

142 Most traders (N=253, 60.7%) were females, and the average age was 35.58 years ( $\pm 10.60$ ).

143 About half of them were married (N= 197 (47.2%)) and had secondary education (N= 222

144 (53.2%)).

145 **Table 1:** Demographic characteristics of traders interviewed (N=417)

146

| Characteristics   | Number of persons (%) |                          |
|-------------------|-----------------------|--------------------------|
| Sex               | Male                  | 164 (39.3)               |
|                   | Female                | 253 (60.7)               |
| Age (years)       | Average               | 35.58 $\pm$ 10.60(17-72) |
| Age (group)       | 17- 30                | 161 (38.6)               |
|                   | 31-45                 | 187 (44.8)               |
|                   | >45                   | 69 (16.6)                |
| Marital status    | Single                | 187 (44.8)               |
|                   | Married/ cohabiting   | 197 (47.2)               |
|                   | Separated/ divorced   | 15 (3.6)                 |
|                   | widowed               | 18 (4.4)                 |
| Ethnicity         | Akan                  | 185 (44.4)               |
|                   | Ga                    | 129 (30.9)               |
|                   | Ewe                   | 71 (17.0)                |
|                   | Non-Ghanaian          | 14 (3.4)                 |
|                   | Other                 | 18 (4.3)                 |
| Educational level | None                  | 43 (10.3)                |
|                   | Primary               | 96 (23.0)                |
|                   | Secondary             | 222 (53.2)               |
|                   | Tertiary              | 56 (13.4)                |
| Religion          | None                  | 4 (1.0)                  |
|                   | Christian             | 377 (90.4)               |
|                   | Muslim                | 33 (8.6)                 |
| Items traded in   | Food                  | 71 (17.0)                |
|                   | Cosmetics             | 78 (18.7)                |
|                   | Clothing              | 142 (34.1)               |
|                   | Stationary            | 32 (7.7)                 |
|                   | Other*                | 94 (22.5)                |
| Place of trade    | Own shop              | 149 (35.7)               |
|                   | Rented shop           | 128 (30.7)               |
|                   | Outside               | 140 (33.6)               |

147 \* Other include tools, medicine, pots and pans, household items

148



149 **Types of antibiotics and indications for use among traders in CBD**

150 The majority (N= 279 (66.7%)) of traders admitted antibiotic self-medication (Table 2). About a  
 151 quarter (23.1%) had self-medicated once in the preceding 12 months, while 30.1% had done so  
 152 twice. The primary indication for antibiotic self-medication were upper respiratory tract  
 153 infections (33.7%) such as sore throat, cold, catarrh, and cough, and gastrointestinal disorders  
 154 like diarrhea and stomach pain (N=86 (30.8%)).

155 Penicillins such as the tablets formulations of amoxicillin, penicillin V, flucloxacillin, and  
 156 amoxicillin/clavulanic acid combination were the most (N= 133 (47.67%)) used in antibiotic  
 157 self-medication. The next most self-medicated antibiotic was metronidazole (N=87 (31.18%)).

158 **Table 2.** Types of antibiotics and indications for use among traders in CBD

|                             | Drug        |            |             |            |             |
|-----------------------------|-------------|------------|-------------|------------|-------------|
|                             | Penicillins | Flagyl     | Antifungals | Others     | TOTAL       |
| URTIs N (%)                 | 44 (33.1)   | 18 (20.7)  | 6 (46.1)    | 26 (56.5)  | 94 (33.7)   |
| GIT N (%)                   | 27 (20.3)   | 51 (58.6)  | 3 (23.1)    | 5 (10.9)   | 86 (30.8)   |
| Skin N (%)                  | 30 (22.6)   | 8 (9.2)    | 1 (7.7)     | 5 (10.9)   | 44 (15.8)   |
| Fever/Pain N (%)            | 11 (8.3)    | 5 (5.7)    | 0 (0.0)     | 2 (4.3)    | 18 (6.5)    |
| Genital Discharge N (%)     | 13 (9.7)    | 4 (4.6)    | 3 (23.1)    | 7 (15.2)   | 27 (9.7)    |
| Other N (%)                 | 8 (6.0)     | 1 (1.2)    | 0 (0.0)     | 1 (2.2)    | 10 (3.5)    |
| Number of respondents N (%) | 133 (47.67) | 87 (31.18) | 13 (4.65)   | 46 (16.49) | 279 (66.91) |

159

160 **Source of information and adherence to antibiotic dosage among traders in CBD**

161 More than half of traders who practiced self-medication with antibiotics (N= 158 (55.2%)) had  
 162 previously consulted pharmacists, while 17.8% (N=51) had consulted their doctors. Moreover,  
 163 most of them (67.5% (193)) knew the quantity to buy from the pharmacist, and about a fifth  
 164 (20.3% (N= 58)) indicated the use of a previous prescription.

165 About 80% (N=227) reported never changing the dosage, while 16.0% (N=45) said they  
 166 sometimes changed the dosages. For those who admitted to changing dosage, the given reasons  
 167 included feeling better (43.7% (N=28), unpleasant side effects (23.4% (N=15)), and worsening  
 168 of conditions (17.2% (N=11)).

169 Most participants (44%, N= 125) indicated they stopped taking the antibiotics after the  
 170 symptoms disappeared, while only 1.8% (N=5) stopped upon consultation with a doctor or  
 171 pharmacist.

172 **Table 3:** Knowledge and characteristics of antibiotic use among traders in the Central Business  
 173 District of Accra, Ghana (N=417).

| Knowledge or characteristics             |                                             | Number of persons (%) |
|------------------------------------------|---------------------------------------------|-----------------------|
| Source of knowledge of quantity to buy   | Pharmacist                                  | 193 (67.5)            |
|                                          | Money available                             | 28 (9.8)              |
|                                          | Previous prescription                       | 58 (20.3)             |
|                                          | Guessing                                    | 4 (1.4)               |
|                                          | Other                                       | 3 (1.0)               |
| Knowledge on dosage                      | Package insert                              | 49 (17.2)             |
|                                          | Consulting doctor                           | 51 (17.8)             |
|                                          | Consulting pharmacist                       | 158 (55.2)            |
|                                          | Family/ friends                             | 27 (9.4)              |
|                                          | Previous experience                         | 1 (0.4)               |
| Tendency to change prescribed doses      | Always                                      | 9 (3.2)               |
|                                          | Sometimes                                   | 45 (16.0)             |
|                                          | Never                                       | 227 (80.8)            |
| Reason for changing prescribed doses     | Improving condition                         | 28 (43.7)             |
|                                          | Worsening condition                         | 11 (17.2)             |
|                                          | To reduce side effects                      | 15 (23.4)             |
|                                          | Insufficient quantity                       | 4 (6.3)               |
|                                          | Other reasons                               | 6 (9.4)               |
| Tendency to switch between antibiotics   | Yes                                         | 8 (2.9)               |
|                                          | Sometimes                                   | 31 (11.2)             |
|                                          | Never                                       | 237 (85.9)            |
| Reason for switching between antibiotics | The drug did not work                       | 17 (36.2)             |
|                                          | The first drug ran out                      | 11 (23.4)             |
|                                          | The latter one was cheaper                  | 7 (14.9)              |
|                                          | Side effects of the drug                    | 7 (14.9)              |
|                                          | Other                                       | 5 (10.6)              |
| Tendency to stop taking                  | After a few days, regardless of the outcome | 4 (1.4)               |

| Knowledge or characteristics |                                          | Number of persons (%) |
|------------------------------|------------------------------------------|-----------------------|
| antibiotics                  | After symptoms disappeared               | 125 (44.0)            |
|                              | Days after recovery                      | 23 (8.1)              |
|                              | After antibiotics ran out                | 16 (5.6)              |
|                              | After completing the course              | 111 (39.1)            |
|                              | Upon consultation with pharmacist/doctor | 5 (1.8)               |

174

175 **Factors associated with self-medication with antibiotics (Table 4)**

176 At the univariable level, females were 1.6 (95% CI; 1.03-2.40) times more likely than males to  
 177 practice self-medication with antibiotics ( $p = 0.03$ ), while those with a primary level of education  
 178 were more likely (O.R. = 2.06, 95% CI; 0.83-5.11) than persons with no education to practice  
 179 self-medication with antibiotics. Traders who had a tertiary level of education (OR= 0.37; 95%  
 180 CI; 0.14-0.91) self-medicate with antibiotics compared to those with no education ( $p=0.01$ ).  
 181 Married couples were less likely (OR= 0.18, 95% CI; 0.54-1.3) than singles to practice self-  
 182 medication. Persons who sold food items (OR= 4.32, 95% CI; 2.03-9.19), cosmetics (OR=2.75,  
 183 95% CI; 1.42-5.31), clothing (OR= 3.53, 95% CI; 1.43-5.31), and stationery (OR=1.70; 95% CI;  
 184 1.94-6.43) were more likely to self-medicate with antibiotics compared to those who sold other  
 185 items ( $p < 0.01$ ).

186 In the multivariate analysis, persons with tertiary education were less likely (aOR = 0.39,  
 187 95%CI; 0.16-0.98) to use antibiotics for self-medication compared to those with no education  
 188 ( $p= 0.04$ ). Persons who sold food items (aOR = 3.56, 95% CI; 1.70-7.45), cosmetics (aOR =  
 189 2.61, 95% CI; 1.34-5.09), and clothing (aOR= 3.39, 95% CI; 1.88-6.12) were more likely to use  
 190 antibiotics for self-medication compared to those who sold other items.

191

| Indicator                   |                    | Antibiotic use |           | Unadjusted model  |         | Adjusted model   |         |
|-----------------------------|--------------------|----------------|-----------|-------------------|---------|------------------|---------|
|                             |                    | Yes (%)        | No (%)    | OR (95%)          | P value | OR (95%)         | P value |
| Age (years) <sup>a</sup>    | 31-45              | 123 (66.5)     | 62 (33.5) | 1.05 (0.67-1.67)  | 0.72    | NA               |         |
|                             | >45 years          | 45 (70.3)      | 19(29.7)  | 1.26 (0.67-2.37)  |         |                  |         |
| Sex                         | Female             | 171 (70.7)     | 71(29.3)  | 1.6 (1.03-2.40)   | 0.03    | 1.36 (0.83-2.24) | 0.22    |
| Education                   | Primary            | 76 (84.4)      | 14 (15.6) | 2.06 (0.83-5.11)  | 0.01    | 1.97 (0.78-4.97) | 0.15    |
|                             | Secondary/Middle   | 135 (62.5)     | 81 (37.5) | 0.63 (0.23-1.34)  |         | 0.63 (0.29-1.34) | 0.25    |
|                             | Tertiary           | 26 (49.1)      | 27 (49.1) | 0.37 (0.14-0.91)  |         | 0.39 (0.16-0.98) | 0.04    |
| Marital status <sup>a</sup> | Married/Cohabiting | 120 (62.8)     | 71 (37.2) | 0.83 (0.54-1.3)   | 0.18    | NA               |         |
|                             | Separated/Divorced | 13 (86.7)      | 2 (13.3)  | 3.19 (0.69-14.8)  |         |                  |         |
|                             | Widowed            | 17 (85.0)      | 3(15.0)   | 2.78 (0.77-10.01) |         |                  |         |
| Place of trade <sup>a</sup> | Rented shop        | 80 (67.2)      | 39 (32.8) | 0.93 (0.56-1.57)  | 0.75    | NA               |         |
|                             | Outside            | 85 (63.9)      | 48 (36.1) | 0.80 (0.49-1.33)  |         |                  |         |
| Items traded                | Food               | 54 (78.3)      | 15 (21.7) | 4.32 (2.03-9.19)  | 0.01    | 3.56 (1.70-7.45) | 0.01    |
|                             | Cosmetics          | 55 (69.6)      | 24 (30.4) | 2.75 (1.42-5.31)  |         | 2.61 (1.34-5.09) | 0.01    |
|                             | Clothing           | 100 (74.6)     | 34 (25.4) | 3.53 (1.43-5.31)  |         | 3.39 (1.88-6.12) | 0.01    |
|                             | Stationary         | 17 (58.6)      | 12 (41.4) | 1.70 (1.94-6.43)  |         | 2.01 (0.79-5.09) | 0.14    |

192

193 **Table 4:** Demographic Predictors of self-medication with antibiotics among traders in CBD

194 <sup>a</sup> Excluded from the multivariate model because of nonsignificant effect at the univariate model.

195 Source: Author's Field Survey, December 2016

196

197

198

199

200

201

202

203

204

## 205 **Discussion**

206 The inappropriate use of oral antibiotics in lower and middle-income countries remains a  
207 challenge to achieving the third sustainable development goal, subsequently contributing to the  
208 increase in antibiotic resistance. Managing all forms of infectious diseases at health facilities  
209 largely depends on effective case detection and diagnosis through systematic screening and,  
210 ultimately, treatment with appropriate antibiotics. However, vulnerable populations such as  
211 traders tend to purchase antibiotics mostly from retail vendors to address self-diagnosed  
212 conditions without prescriptions. The study has found that the prevalence of antibiotic self-  
213 medication among traders in the CBD, Accra was 66.7%. The most commonly self-medicated  
214 are the Penicillins, with the treatment of upper respiratory infections being the main reason for  
215 self-medication. Whereas traders who sold food items, cosmetics, and clothes were more likely  
216 to self-medicate than other traders, those with higher education were less likely to self-medicate  
217 than those without any education.

218 A previous study that explored antibiotic self-medication among university students in  
219 Accra, Ghana, found the prevalence to be 21% [17]. The higher prevalence of 66.7% found in  
220 the present study among traders is consistent with the further finding of the effect of education  
221 on the tendency to self-medicate [18]. The high prevalence can be explained by the country  
222 being disproportionately affected by infectious diseases encouraging the use of antibiotics for  
223 self-medication, limited access to healthcare, and lack of antibiotic regulations [19, 20].

224 In our study, about 10% of traders had at least a tertiary level of education. This may lead  
225 to an assumption that the higher the educational level, the less likely it was to self-medicate with  
226 antibiotics. A study conducted in Serbia buttressed this assumption, reporting a self-medication  
227 prevalence of 46% among university students [21]. An attributable reason for the observed high  
228 prevalence in this study could be that although antibiotics are prescription-only medicines,  
229 regulatory measures are not strict enough to enforce them, making them easily accessible to such  
230 drugs [22]. In addition to these regulatory aspects, other differences in health care systems such  
231 as drug prices and reimbursement policies may also influence the public's attitudes towards  
232 antibiotic use and self-medication [23].

233 This study revealed five main conditions for which antibiotics were used. Upper  
234 respiratory tract infections (URTIs), reported as cough, common cold, and sore throat, were the  
235 most common ones like those reported in studies in Nigeria, Kuwait, and Ethiopia [11, 15, 24]. A  
236 study on antibiotic use in children under five years in Kintampo Municipal Hospital, Ghana, also  
237 mentioned upper respiratory tract infections as the major indication for antibiotic use [25]. In this  
238 study, gastrointestinal disorders recorded as diarrhea and stomachache followed URTIs. This is  
239 consistent with findings in other studies [26, 27].

240 The problem with using antibiotics for diarrhea is that viruses cause most diarrhea cases,  
241 and hence it is not imperative to use antibiotics for such cases. This creates a condition for the  
242 development of resistance to antibiotics [27]. Similar to our findings, other studies also  
243 mentioned skin diseases and penile/urethral discharge as indications for antibiotics use [11].

244 Among the several available antibiotics, our findings identified two major antibiotics  
245 used for self-medication: penicillins and metronidazole. The choice of antibiotics from the

246 penicillins group (especially flucloxacillin and amoxicillin) by most respondents in our study is  
247 in line with findings from other studies [27, 28]. The common reasons for the patronage of  
248 penicillins could be because they are cheap, easily accessible, have a good safety profile, and  
249 possesses broad-spectrum antimicrobial activity [22]. The reasons can further be explored using  
250 qualitative research. Also, even though antibiotics are supposed to be prescription-only  
251 medicines, they are easily accessible partly because regulatory measures are not strictly enforced.  
252 The frequency of metronidazole use as recorded in this study was high, compared to another  
253 study in Northern Nigeria which reported a value of 17.6% [27]. The difference could be due to  
254 socio-demographic variation between study participants. For research purposes, antifungals were  
255 included in the definition of antibiotics, and similar to our findings, it was found out in another  
256 study that antifungals were used chiefly for skin-related infections [29].

257 Education was an independent predictor for antibiotic self-medication among the traders.  
258 The odds of self-medication were lower among respondents with a higher level of education  
259 relative to traders with lower education. This parallels results from other studies where varying  
260 levels of education impacted the likelihood to self-medicate with antibiotics [6, 30]. This  
261 phenomenon may be attributed to the fact that educated persons are likely to have knowledge of  
262 the implications of antibiotic misuse and hence desist from the act. However, other studies  
263 dispute this fact, reporting that more educated people had a higher tendency to use antibiotics  
264 [31]. Contrary to findings in other studies [6, 32], this study did not find gender to be  
265 independently associated with self-medication with antibiotics.

266 Three significant sources of information on antibiotics for self-medication were  
267 identified: the pharmacist, the doctor, and package inserts. Pharmacists have also been identified  
268 in most studies as the primary source of information on drugs used in self-medication [33]. In

269 their professional capacity and direct contact with patients, the community pharmacist is  
270 competent to provide sound advice on the medicines they supply and screen for conditions at the  
271 level of a primary healthcare provider [11, 34]. Hence, the role of community pharmacists in  
272 self-medication with antibiotics needs to be encouraged to promote responsible use of drugs.  
273 Consulting doctors, in other studies, was, however, the primary source of information compared  
274 to pharmacists [30]. The difference in these studies could be due to socio-demographic  
275 differences and health-seeking behaviors. A finding in this study was that the third common  
276 source of information was reading the package leaflet. Some studies mentioned reading  
277 pamphlets as a source of information, but the participants were university students and lecturers  
278 [29, 35]. Friends and family members were also revealed to be a source of information in this  
279 study, and this has been reported in studies in Egypt [7] and among adolescents in Kuwait [24].  
280 This may reflect the belief in the value of other people's experiences and the views of older  
281 adults.

## 282 **Limitations**

283 Antibiotic self-medication was self-reported, and some participants may have not voluntarily  
284 reported the practice because they knew it was frowned upon, and there is public education  
285 against self-medication. Therefore, it is conceivable that the prevalence determined in this study  
286 was an underestimation and the true prevalence is much higher.

287 The lack of a complete list of traders and their shops made it impossible to target a  
288 representative sample of the traders due to the majority of participants being mobile. This limits  
289 the generalizability of the study's findings; however, data were collected mainly in three of the



290 busiest market centers in Accra. Finally, there may be recall bias since respondents were asked to  
291 recount their antibiotic use in the past year.

292

293

294

## 295 **Conclusion**

296 The prevalence of self-medication with antibiotics was high among the traders, and penicillins  
297 are the most common antibiotics used in self-medication. Higher education and the type of items  
298 sold were independent predictors of self-medication practice among the respondents.

299 We recommend that a holistic approach should be used in addressing self-medication  
300 with antibiotics and this would involve strengthening drug regulatory measures, organizing  
301 health education programs on the dangers of self-medicating with antibiotics and the  
302 implications of antibiotic resistance, and empowering community pharmacists operating in the  
303 CBD to provide one-on-one education for traders who call to procure analgesics and antibiotics.

304

305

306

307

308

309

310

311

312

313

## 314 **References**

- 315 1. Levy SB. Antibiotic resistance—the problem intensifies. *Advanced drug delivery*  
316 *reviews*. 2005;57(10):1446-50.
- 317 2. Al-Bakri AG, Bustanji Y, Yousef A-M. Community consumption of antibacterial drugs  
318 within the Jordanian population: sources, patterns, and appropriateness. *International*  
319 *Journal of Antimicrobial Agents*. 2005;26(5):389-95.
- 320 3. Smith RD, Coast J, Millar MR, Wilton P, Karcher A-M, editors. *Interventions against*  
321 *antimicrobial resistance: A review of the literature and exploration of modelling cost-*  
322 *effectiveness*. Geneva: Global Forum for Health Research; 2001: Citeseer.
- 323 4. Berzanskyte A, Valinteliene R, Haaijer-Ruskamp F, Gurevicius R, Grigoryan L, health e.  
324 *Self-medication with antibiotics in Lithuania*. *International journal of occupational*  
325 *medicine*. 2006;19(4):246-53.
- 326 5. Agyei-Boateng R. *Self-medication practices among pregnant women in Ejisu-Juaben*  
327 *Municipality 2015*.
- 328 6. Alzhahrani OM, Aloqbi HS. *A descriptive study of self-medication practices among*  
329 *patients in a public health care system in Tabuk City*. 2015.

- 330 7. El Nimr N, Wahdan I, Wahdan A, Kotb R. Self-medication with drugs and  
331 complementary and alternative medicines in Alexandria, Egypt: prevalence, patterns and  
332 determinants. *Eastern Mediterranean Health Journal*. 2015;21(4):256-65.
- 333 8. Solomon DH, Van Houten L, Glynn RJ, Baden L, Curtis K, Schrager H, et al. Academic  
334 detailing to improve use of broad-spectrum antibiotics at an academic medical center.  
335 *Archives of internal medicine*. 2001;161(15):1897-902.
- 336 9. Avorn J, Soumerai SB, Taylor W, Wessels MR, Janousek J, Weiner M. Reduction of  
337 incorrect antibiotic dosing through a structured educational order form. *Archives of*  
338 *Internal Medicine*. 1988;148(8):1720-4.
- 339 10. Anstey Watkins J, Wagner F, Xavier Gómez-Olivé F, Wertheim H, Sankoh O, Kinsman  
340 J. Rural South African Community Perceptions of Antibiotic Access and Use: Qualitative  
341 Evidence from a Health and Demographic Surveillance System Site. *Am J Trop Med*  
342 *Hyg*. 2019;100(6):1378-90.
- 343 11. Eticha T, Mesfin K. Self-medication practices in Mekelle, Ethiopia. *PloS one*.  
344 2014;9(5):e97464.
- 345 12. Osemene K, Lamikanra A. A study of the prevalence of self-medication practice among  
346 university students in Southwestern Nigeria. *Tropical Journal of Pharmaceutical*  
347 *Research*. 2012;11(4):683-9.
- 348 13. Yevutsey SK, Buabeng KO, Aikins M, Anto BP, Biritwum RB, Frimodt-Møller N, et al.  
349 Situational analysis of antibiotic use and resistance in Ghana: policy and regulation.  
350 *BMC public health*. 2017;17(1):1-7.
- 351 14. Senah KA. Money be man: The popularity of medicines in a rural Ghanaian community:  
352 *Het Spinhuis*; 1997.

- 353 15. Ajibola O, Omisakin OA, Eze AA, Omoleke SA. Self-Medication with Antibiotics,  
354 Attitude and Knowledge of Antibiotic Resistance among Community Residents and  
355 Undergraduate Students in Northwest Nigeria. *Diseases*. 2018;6(2):32.
- 356 16. Ghaieth MF, Elhag SRM, Hussien ME, Konozy EHE. Antibiotics self-medication among  
357 medical and nonmedical students at two prominent Universities in Benghazi City, Libya.  
358 *J Pharm Bioallied Sci*. 2015;7(2):109-15.
- 359 17. Donkor ES, Tetteh-Quarcoop PB, Nartey P, Agyeman IO. Self-medication practices with  
360 antibiotics among tertiary level students in Accra, Ghana: a cross-sectional study. *Int J*  
361 *Environ Res Public Health*. 2012;9(10):3519-29.
- 362 18. Worku S. Practice of self-medication in Jimma Town. *Ethiopian Journal of Health*  
363 *Development*. 2003;17(2):111-6.
- 364 19. Vernyuy Yeika E, Ingelbeen B, Kemah BL, Sevidzem Wirsiy F, Nkeangu Fomengia J,  
365 van der Sande MAB. Comparative Assessment of the Prevalence, Practices and Factors  
366 Associated with Self-medication with Antibiotics in Africa. *Tropical medicine &*  
367 *international health : TM & IH*. 2021.
- 368 20. Ocan M, Obuku EA, Bwanga F, Akena D, Richard S, Ogwal-Okeng J, et al. Household  
369 antimicrobial self-medication: a systematic review and meta-analysis of the burden, risk  
370 factors and outcomes in developing countries. *BMC public health*. 2015;15(1):1-11.
- 371 21. Lukovic JA, Miletic V, Pekmezovic T, Trajkovic G, Ratkovic N, Aleksic D, et al. Self-  
372 medication practices and risk factors for self-medication among medical students in  
373 Belgrade, Serbia. *PloS one*. 2014;9(12):e114644.

- 374 22. Jimah T, Fenny AP, Ogunseitan O. Antibiotics stewardship in Ghana: a cross-sectional  
375 study of public knowledge, attitudes, and practices among communities. *One Health*  
376 *Outlook*. 2020;2(1):1-10.
- 377 23. Grigoryan L, Burgerhof JG, Degener JE, Deschepper R, Lundborg CS, Monnet DL, et al.  
378 Attitudes, beliefs and knowledge concerning antibiotic use and self-medication: a  
379 comparative European study. *Pharmacoepidemiology*. 2007;16(11):1234-43.
- 380 24. Abahussain E, Matowe LK, Nicholls P, practice. Self-reported medication use among  
381 adolescents in Kuwait. *Medical principles*. 2005;14(3):161-4.
- 382 25. Sumaila A-N, Tabong PT-N. Rational prescribing of antibiotics in children under 5 years  
383 with upper respiratory tract infections in Kintampo Municipal Hospital in Brong Ahafo  
384 Region of Ghana. *BMC research notes*. 2018;11(1):443.
- 385 26. Abasaheed A, Vlcek J, Abuelkhair M, Kubena A. Self-medication with antibiotics by the  
386 community of Abu Dhabi Emirate, United Arab Emirates. *The Journal of Infection in*  
387 *Developing Countries*. 2009;3(07):491-7.
- 388 27. Fadare JO, Tamuno I. Antibiotic self-medication among university medical  
389 undergraduates in Northern Nigeria. *Journal of public health and Epidemiology*.  
390 2011;3(5):217-20.
- 391 28. Okeke IN, Lamikanra A, Edelman R. Socioeconomic and behavioral factors leading to  
392 acquired bacterial resistance to antibiotics in developing countries. *Emerging infectious*  
393 *diseases*. 1999;5(1):18.
- 394 29. Zafar SN, Syed R, Waqar S, Zubairi AJ, Vaqar T, Shaikh M, et al. Self-medication  
395 amongst university students of Karachi: prevalence, knowledge and attitudes. *Journal of*  
396 *the Pakistan Medical Association*. 2008;58(4):214.

- 397 30. Garofalo L, Di Giuseppe G, Angelillo IF. Self-medication practices among parents in  
398 Italy. *BioMed research international*. 2015;2015.
- 399 31. Shankar P, Partha P, Shenoy N. Self-medication and non-doctor prescription practices in  
400 Pokhara valley, Western Nepal: a questionnaire-based study. *BMC family practice*.  
401 2002;3(1):1-7.
- 402 32. Kumar N, Kanchan T, Unnikrishnan B, Rekha T, Mithra P, Kulkarni V, et al. Perceptions  
403 and practices of self-medication among medical students in coastal South India. *PloS one*.  
404 2013;8(8):e72247.
- 405 33. Amankwa CE, Bonful HA, Agyabeng K, Nortey PA. Dispensing practices for anti-  
406 malarials in the La Nkwantanang-Madina municipality, Greater Accra, Ghana: a cross-  
407 sectional study. *Malaria journal*. 2019;18(1):1-11.
- 408 34. Akutey R, Der R, Owusu-Daaku F, Baiden F. Using community pharmacies to expand  
409 access to screening for noncommunicable diseases in suburban Ghana-A facility-based  
410 survey on client needs and acceptability. *Health science reports*. 2018;1(9):e79.
- 411 35. Chen J, Murtaza G, Nadeem N, Shao X, Siddiqi BG, Shafique Z, et al. A questionnaire  
412 based survey study for the evaluation of knowledge of Pakistani University teachers  
413 regarding their awareness about ibuprofen as an over the counter analgesic. *Acta Pol  
414 Pharm*. 2014;71(2):337-42.

415  
416  
417  
418  
419  
420

421

422

423 **Corresponding Author:** Emmanuel Akowuah, Department of Public Health, Baylor University,  
424 One Bear Place #97343, Waco, TX, USA. Phone: 912-678-6116, Email:  
425 Emmanuel\_Akowuah@baylor.edu
